# Supplementary material for: Rare HIV-1 transmitted/founder lineages identified by deep viral sequencing contribute to rapid shifts in dominant quasispecies during acute and early infection
Source: PubMed Central journal article supplement (PMC5552316; doi:10.1371/journal.ppat.1006510), 2017-07-31
Supplement: ppat.1006510.s004.pdf [file ppat.1006510.s004.pdf]

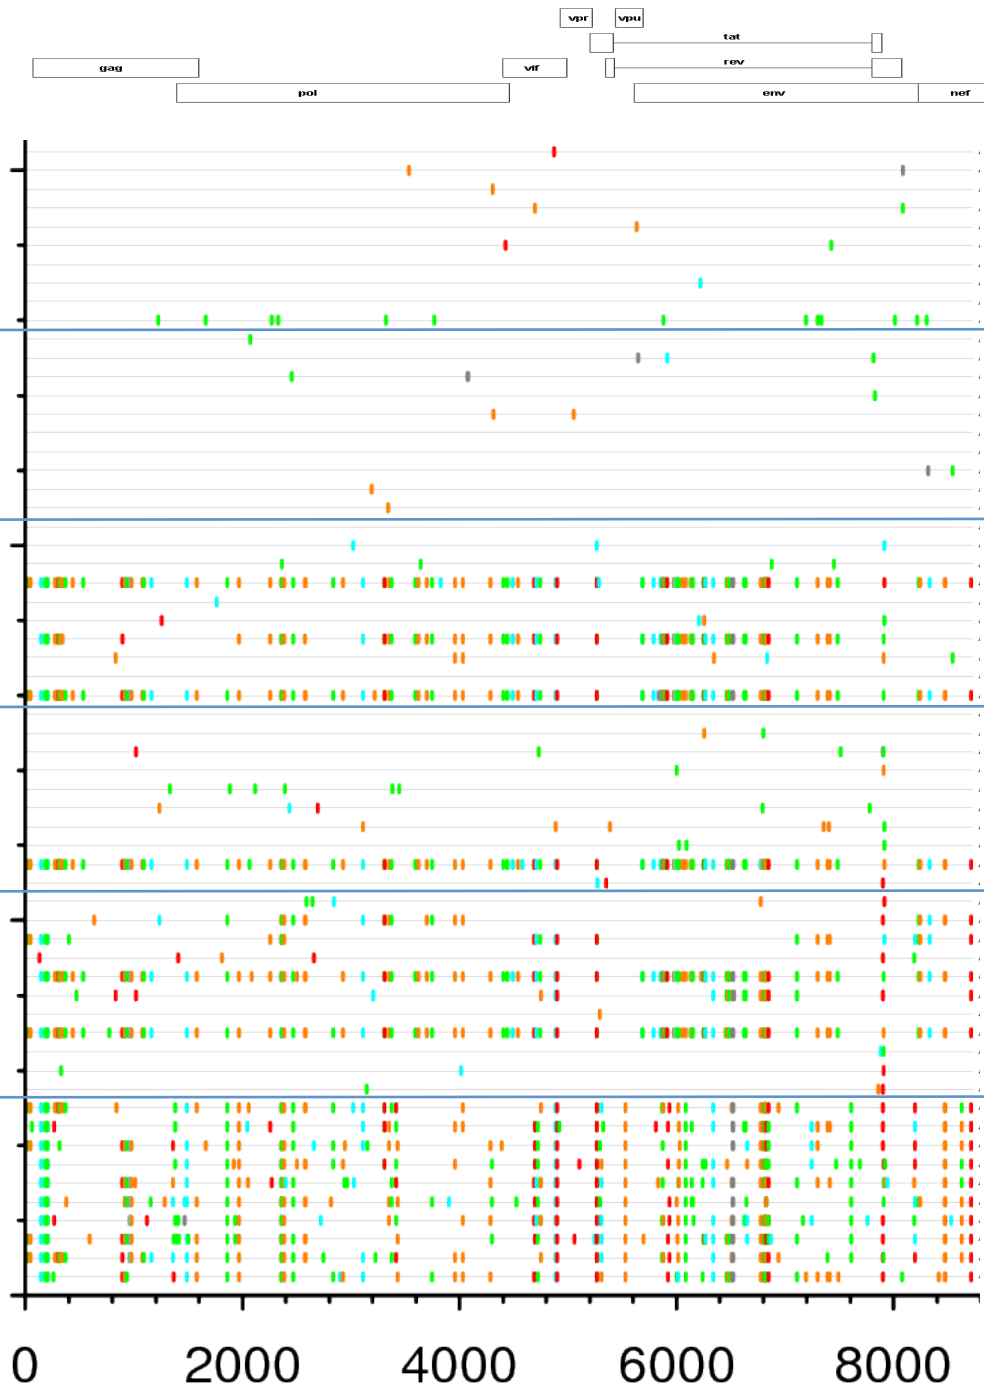

day 2

day 14

day 21

day 24

day 31

day 178

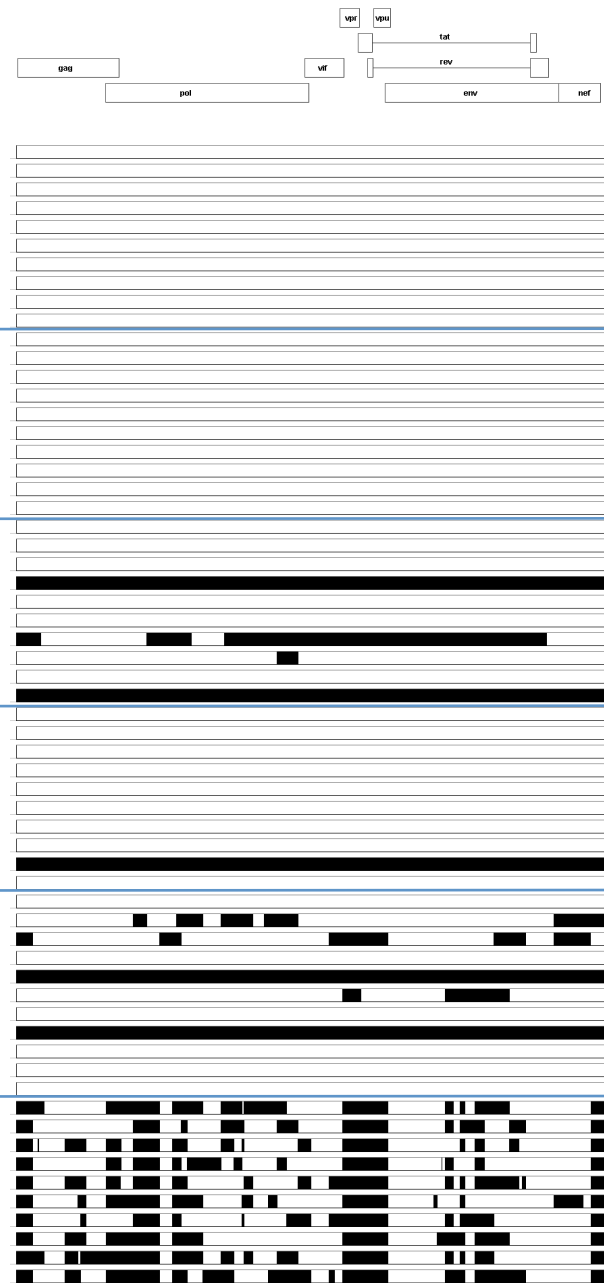

□ Major    ■ minor
