# Supplementary material for: Rare HIV-1 transmitted/founder lineages identified by deep viral sequencing contribute to rapid shifts in dominant quasispecies during acute and early infection
Source: PubMed Central journal article supplement (PMC5552316; doi:10.1371/journal.ppat.1006510), 2017-07-31

a)

40061 p2

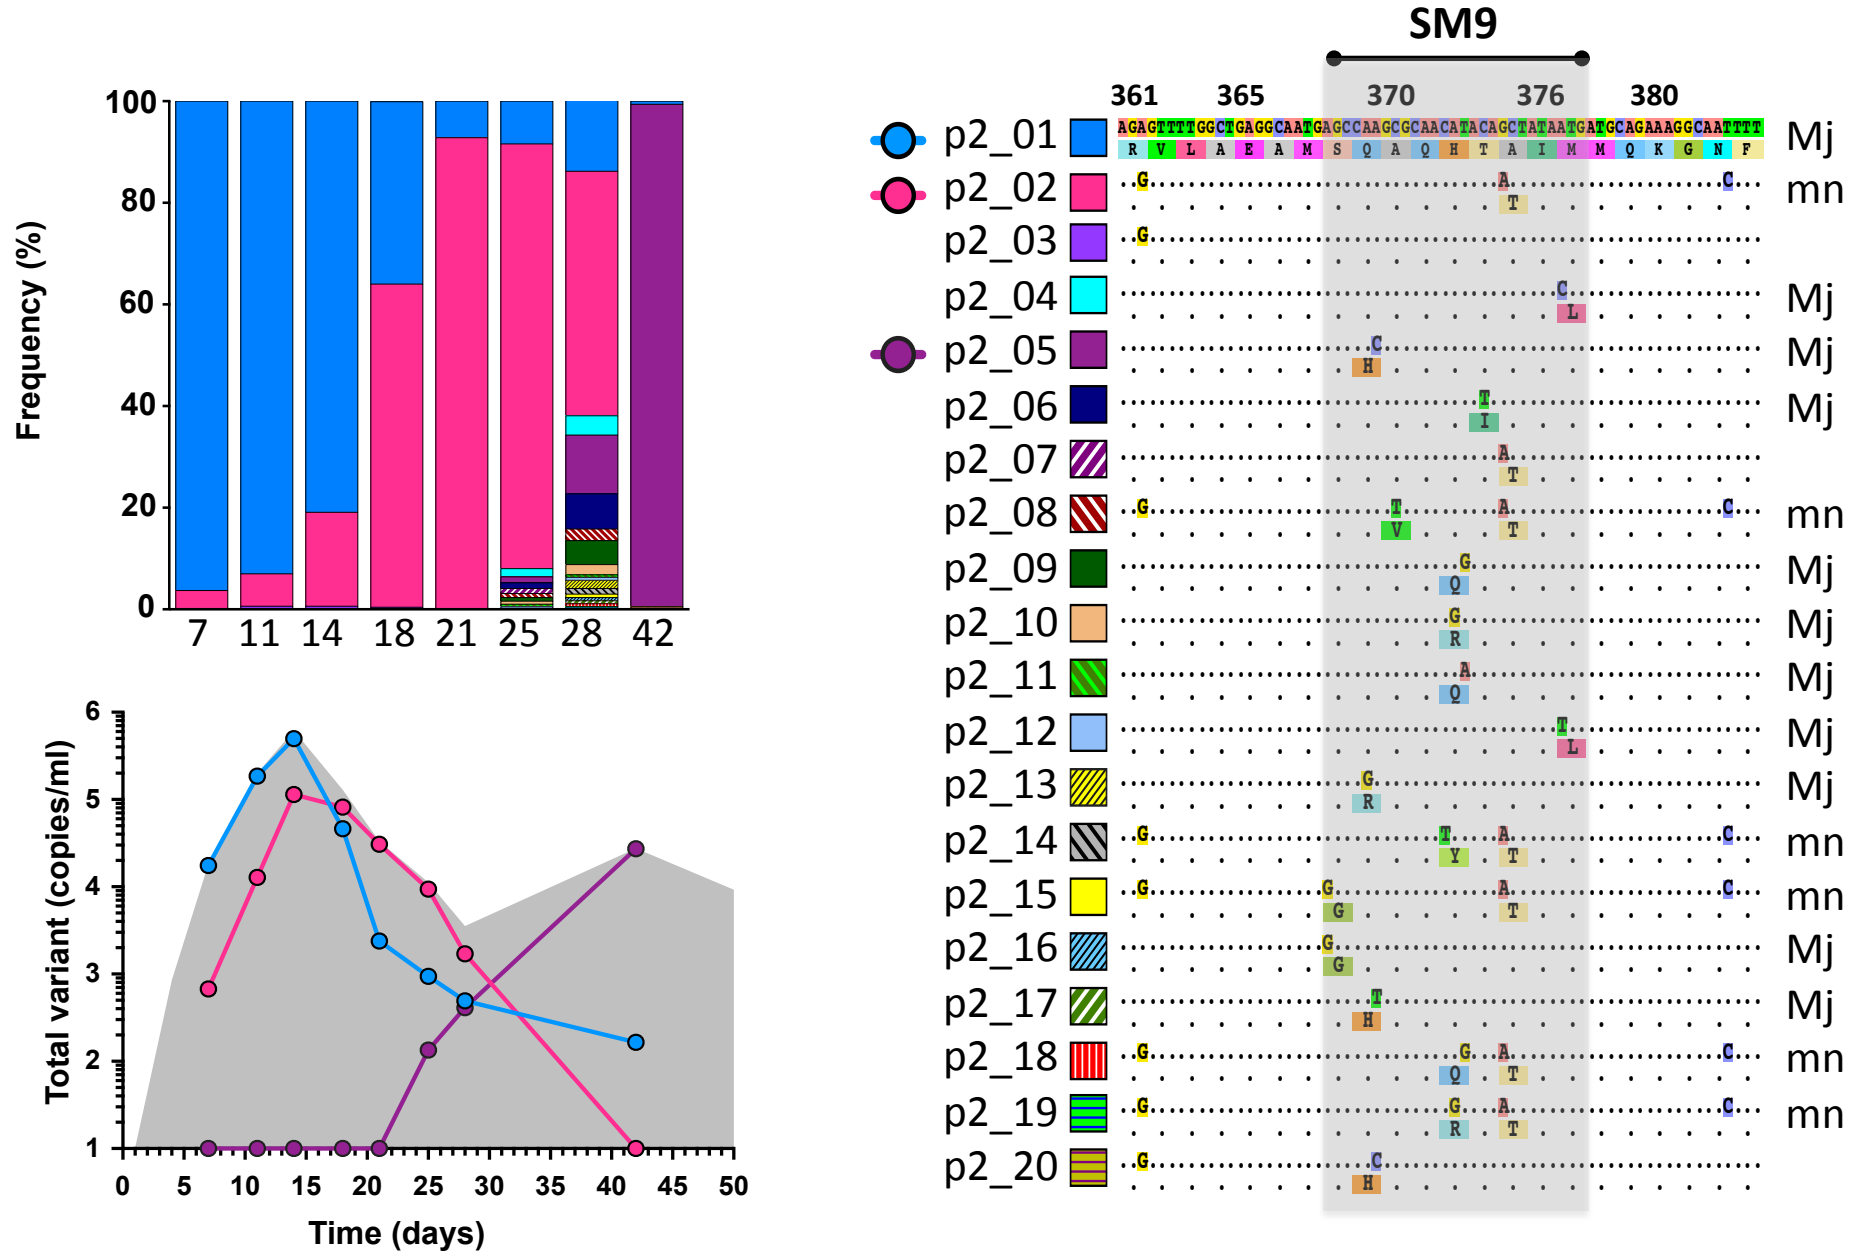

b)

### 40061 Vif

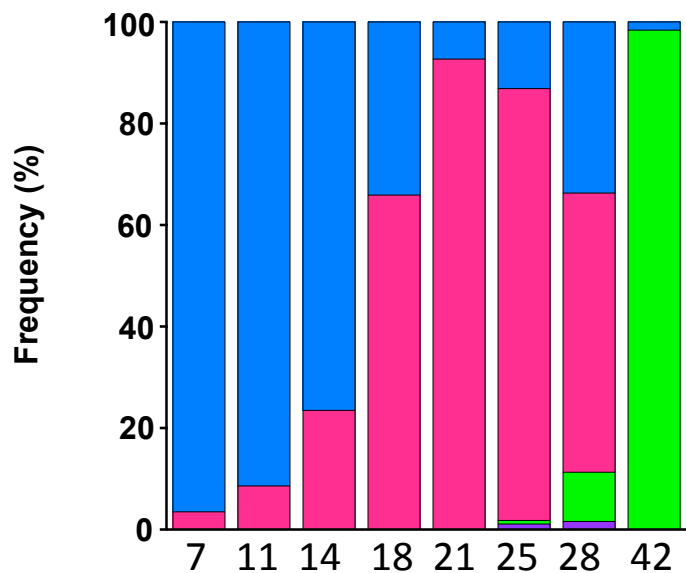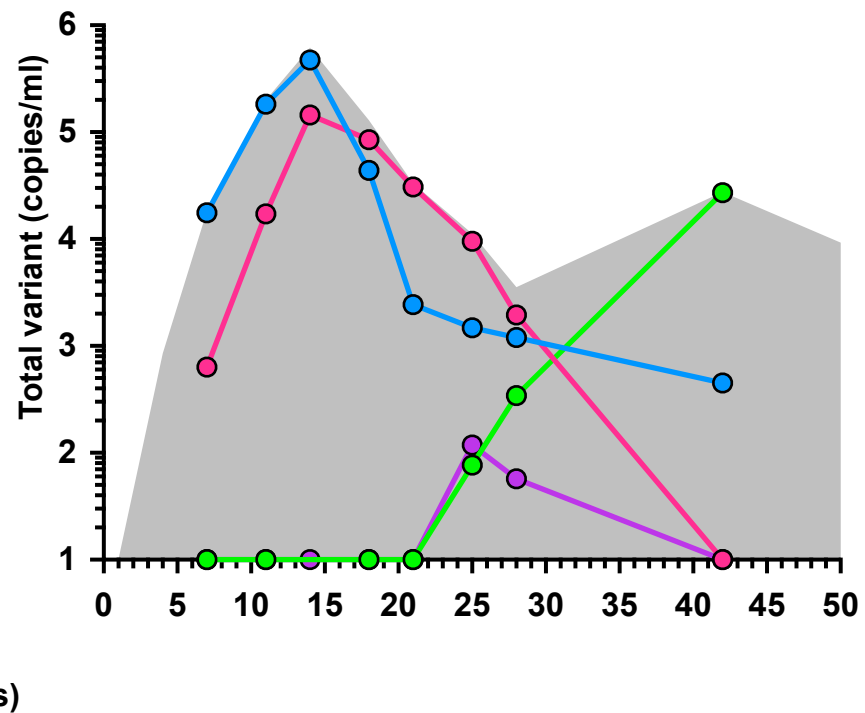

### QY9

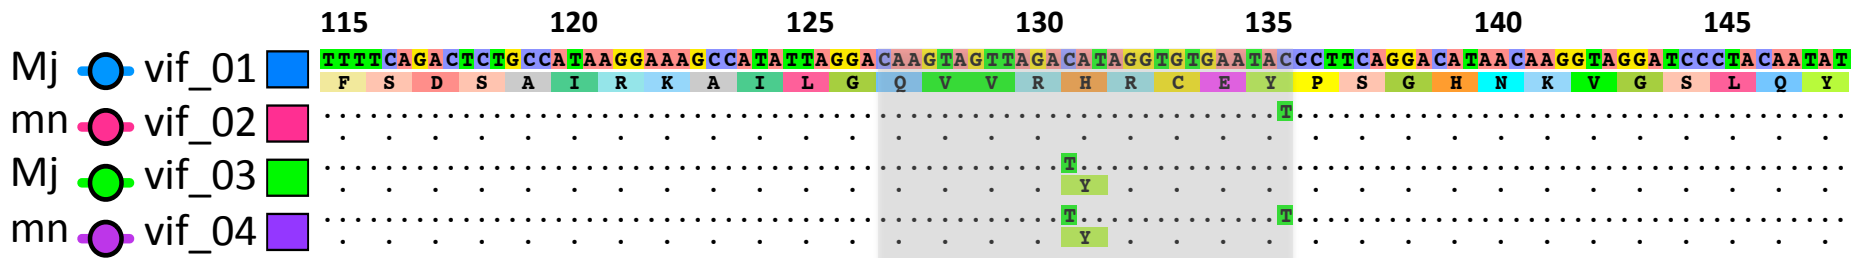

c)

40061 Vpr

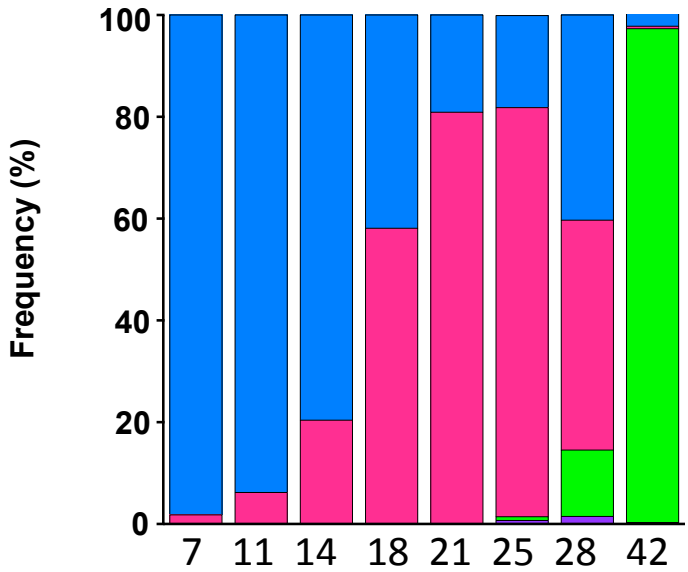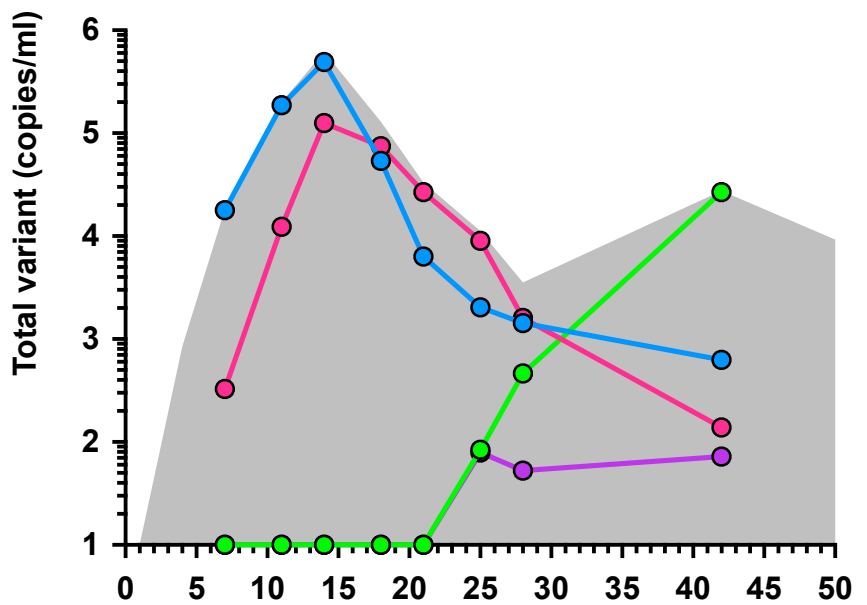

Time (days)

NY9

WL9

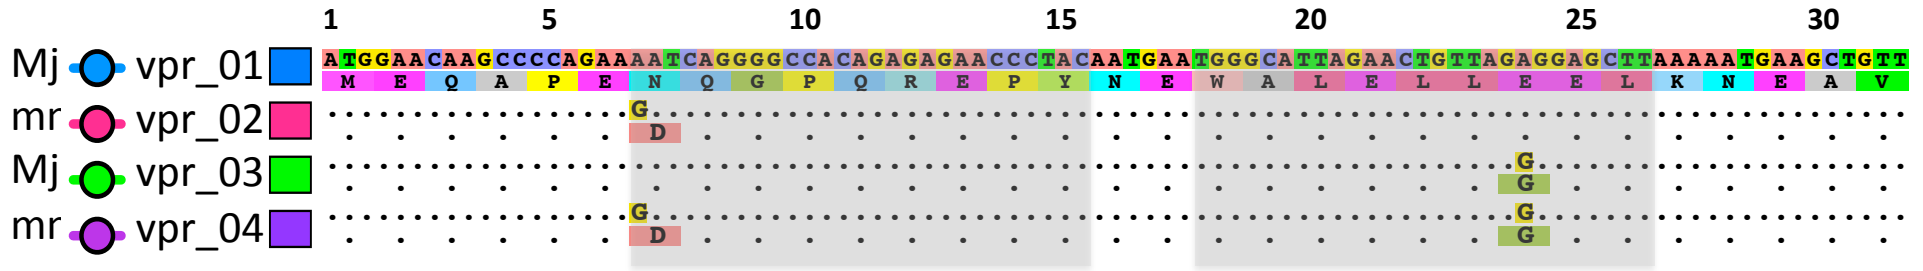

d)

### 40061 gp41

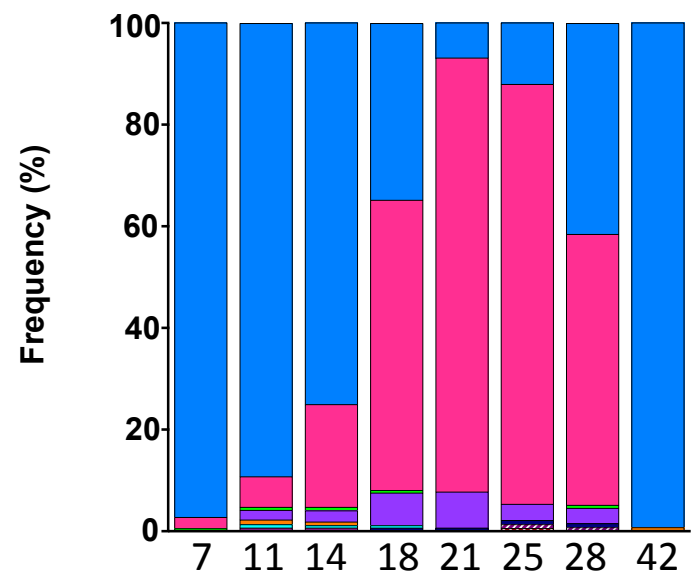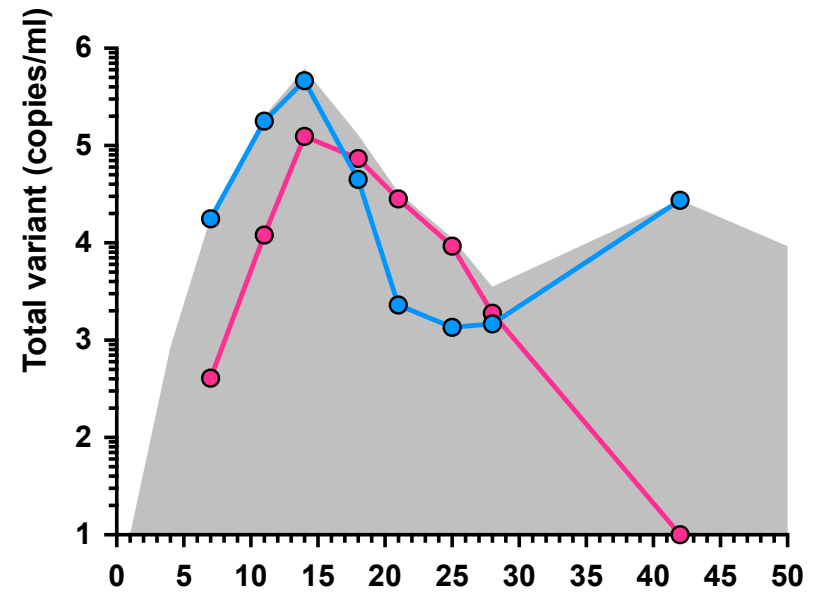

Time (days)

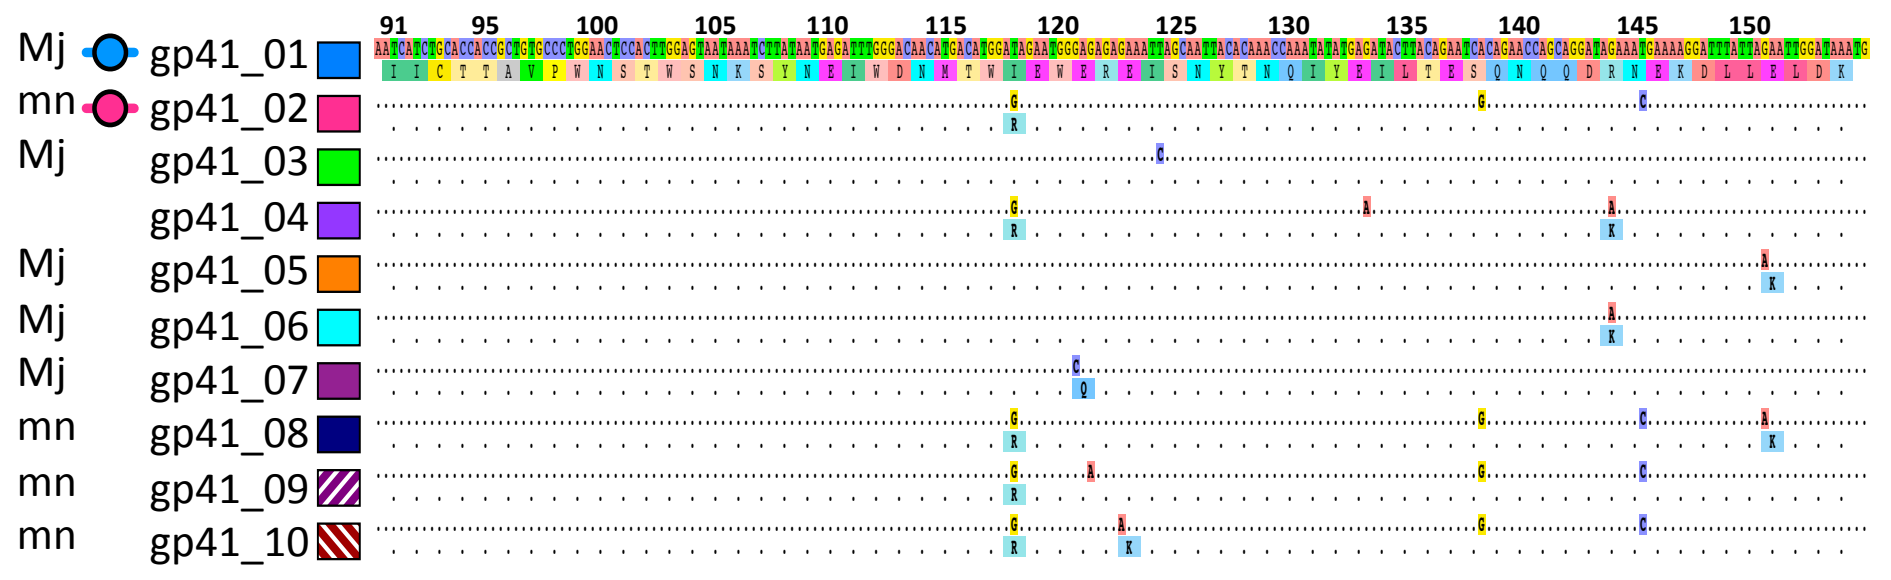

Supplement: ppat.1006510.s005.pdf [file ppat.1006510.s005.pdf]
