# Supplementary material for: Rare HIV-1 transmitted/founder lineages identified by deep viral sequencing contribute to rapid shifts in dominant quasispecies during acute and early infection
Source: PubMed Central journal article supplement (PMC5552316; doi:10.1371/journal.ppat.1006510), 2017-07-31
Supplement: ppat.1006510.s006.pdf [file ppat.1006510.s006.pdf]

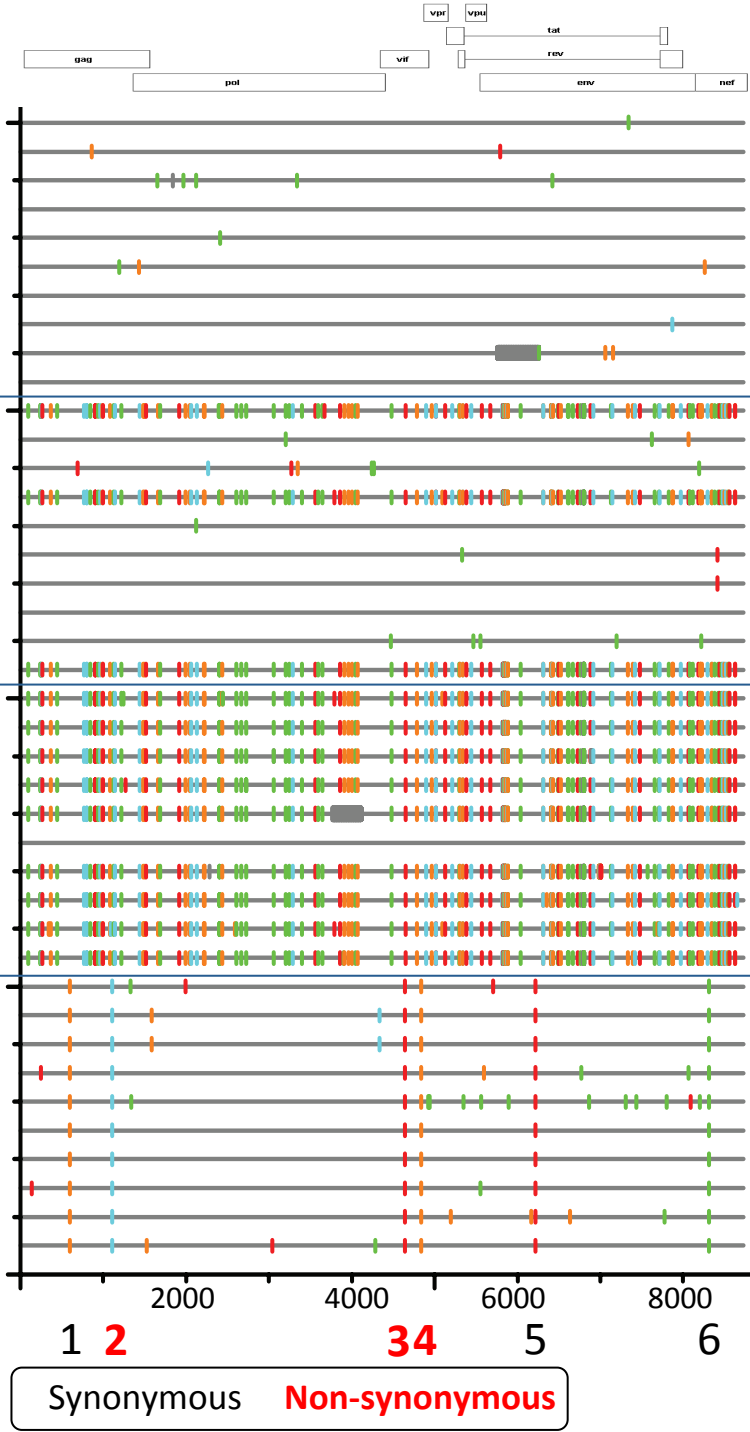

day 7

day 14

day 21

day 42

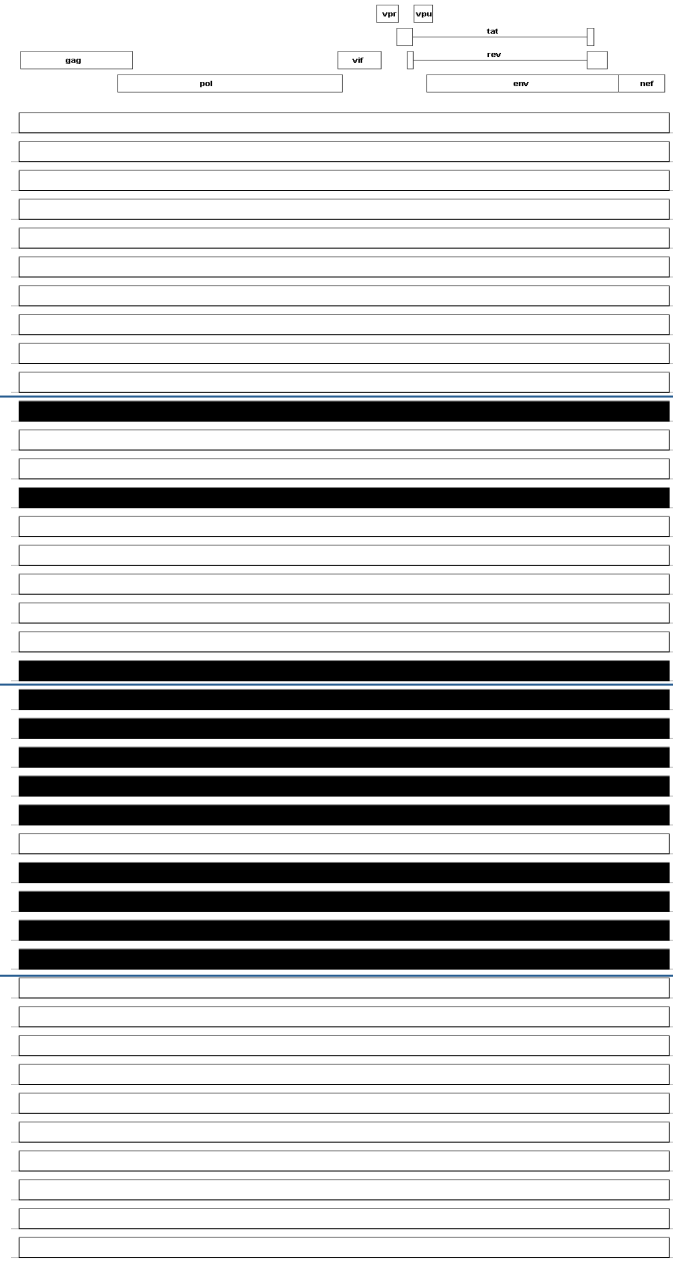

**Mutations**

- 1: *p24 (gag)*  
 Codon 67  
 (Q) CAA -> (Q) CAG
- 2: *p2 (gag)*  
 Codon 6  
 Epitope SM9  
 (Q) CAA -> (H) CAC
- 3: *vif*  
 Codon 131  
 Epitope QY9  
 (H) CAT -> (Y) TAT
- 4: *vpr*  
 Codon 24  
 Epitope WL9  
 (E) GAG -> (G) GGG
- 5: *gp120 (env)*  
 Codon 262  
 (N) AAC -> (N) AAT
- 6: *nef*  
 Codon 94  
 (K) AAG -> (K) AAA

□ Major      ■ minor
