# Supplementary material for: Rare HIV-1 transmitted/founder lineages identified by deep viral sequencing contribute to rapid shifts in dominant quasispecies during acute and early infection
Source: PubMed Central journal article supplement (PMC5552316; doi:10.1371/journal.ppat.1006510), 2017-07-31

a)

# Participant 40436 p7

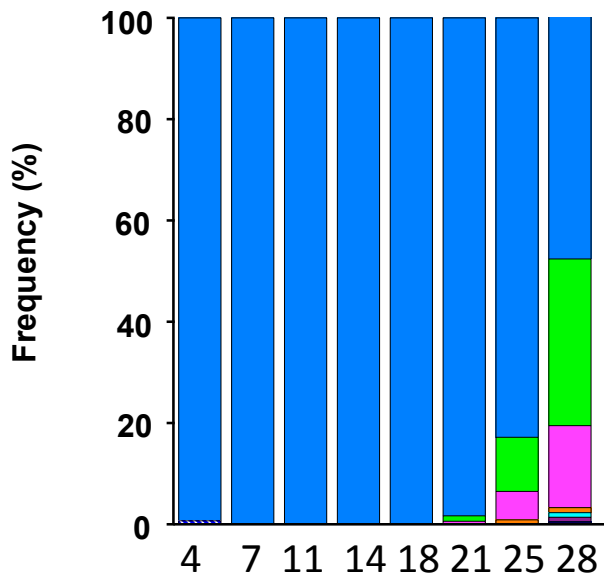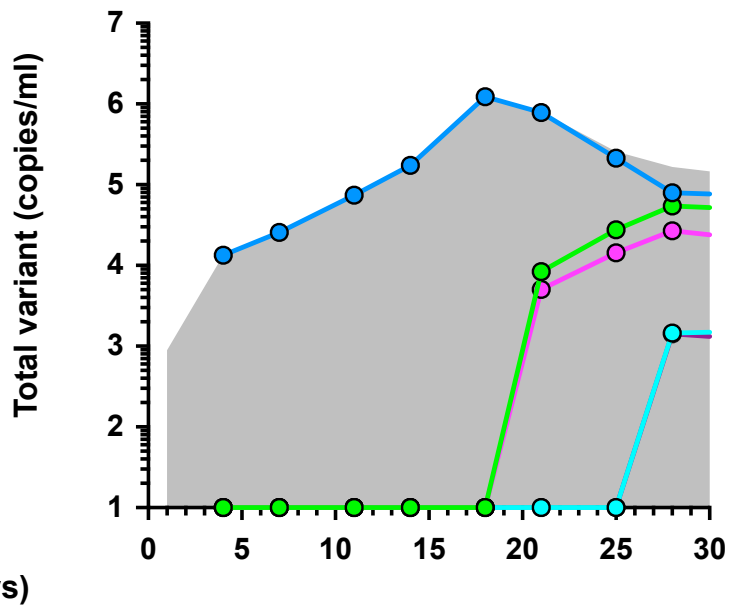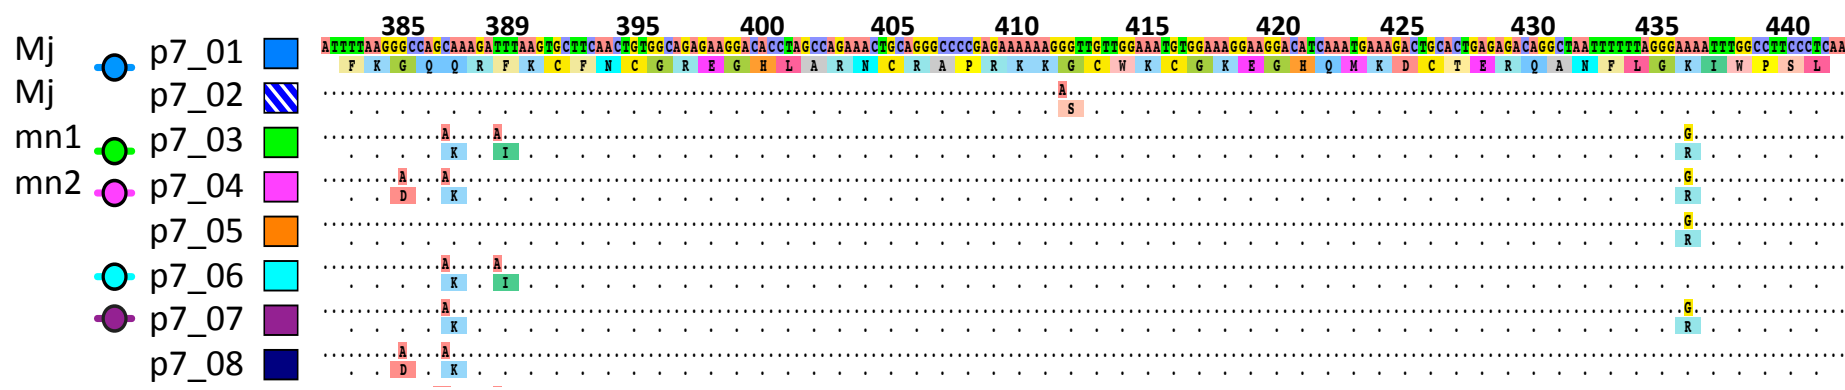

b)

## Participant 40436 C3V4

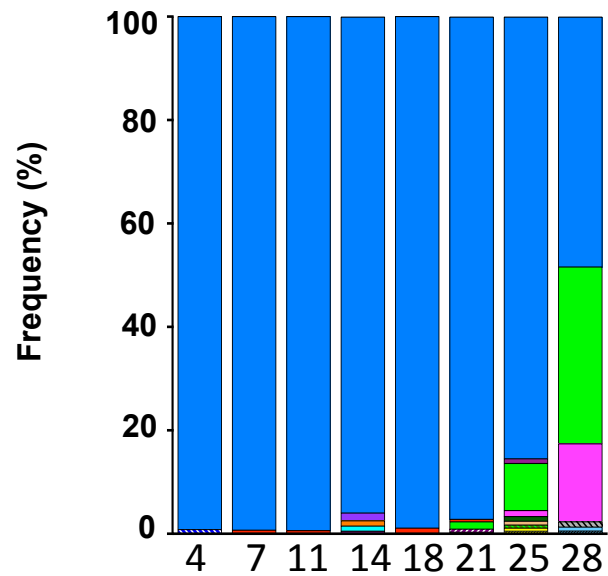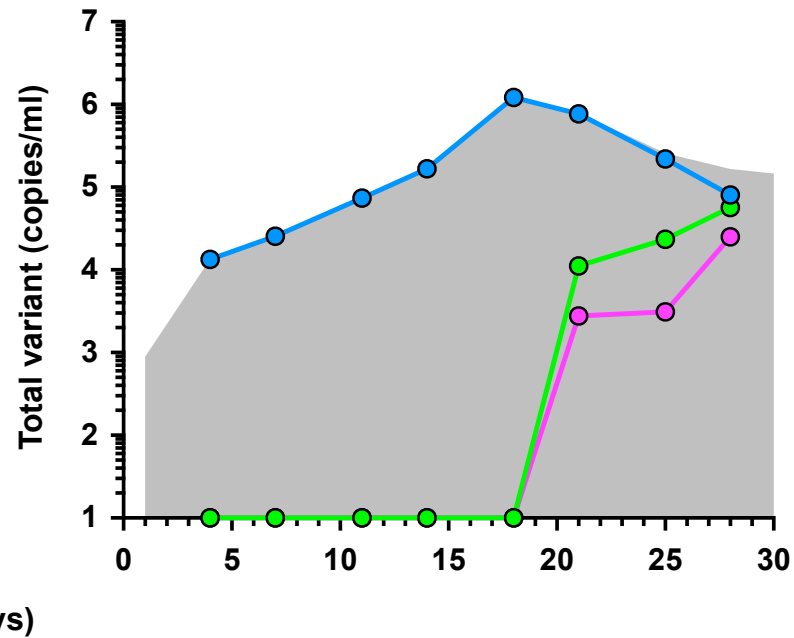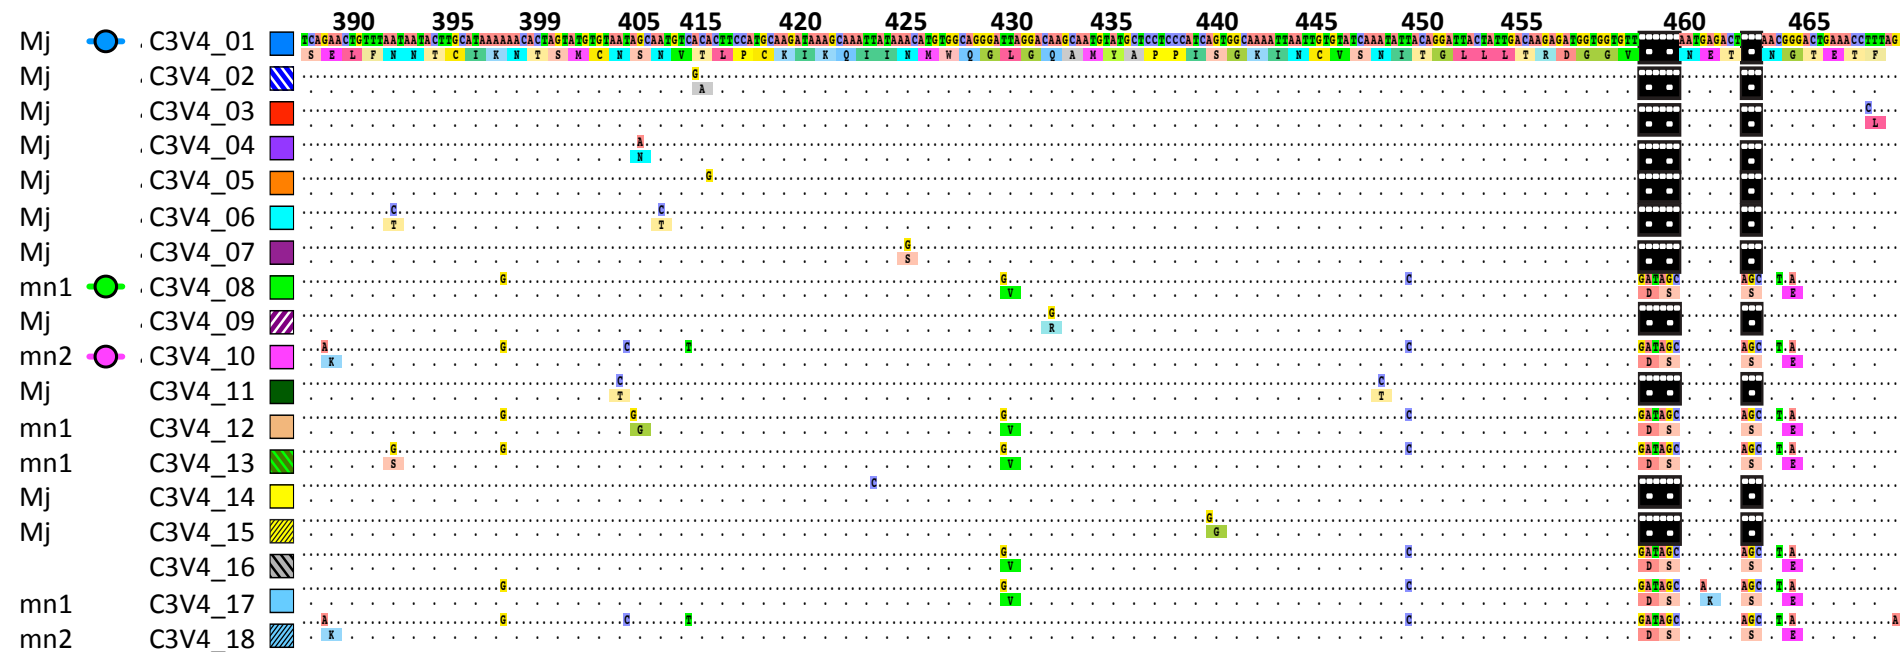

Supplement: ppat.1006510.s007.pdf [file ppat.1006510.s007.pdf]
