# Supplementary material for: Rare HIV-1 transmitted/founder lineages identified by deep viral sequencing contribute to rapid shifts in dominant quasispecies during acute and early infection
Source: PubMed Central journal article supplement (PMC5552316; doi:10.1371/journal.ppat.1006510), 2017-07-31

a)

Participant 40265 gag

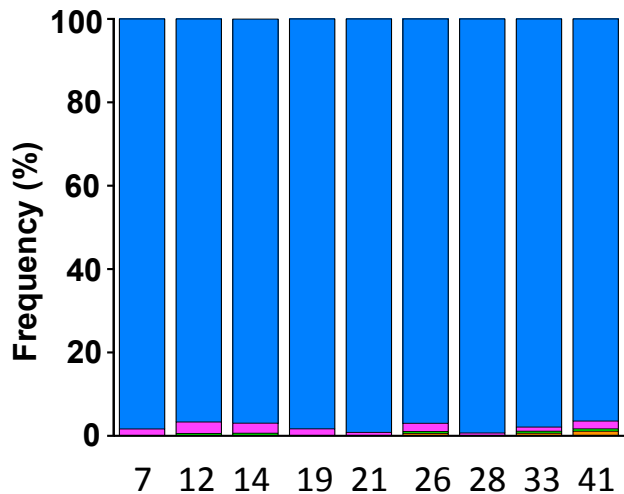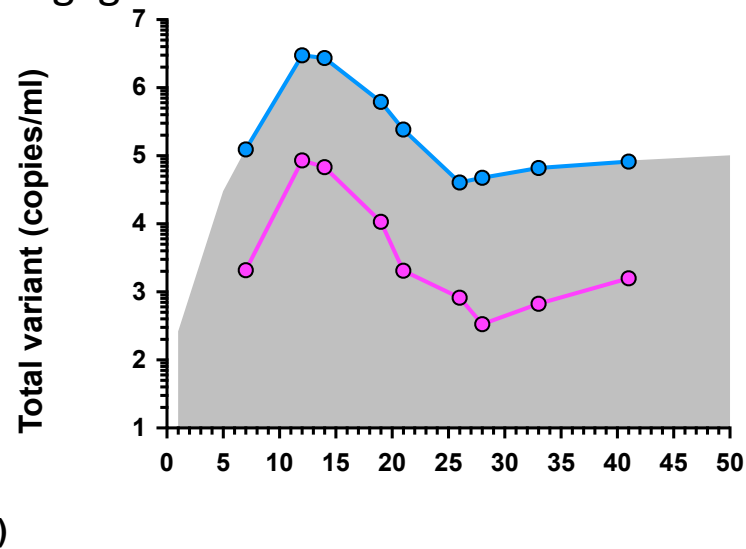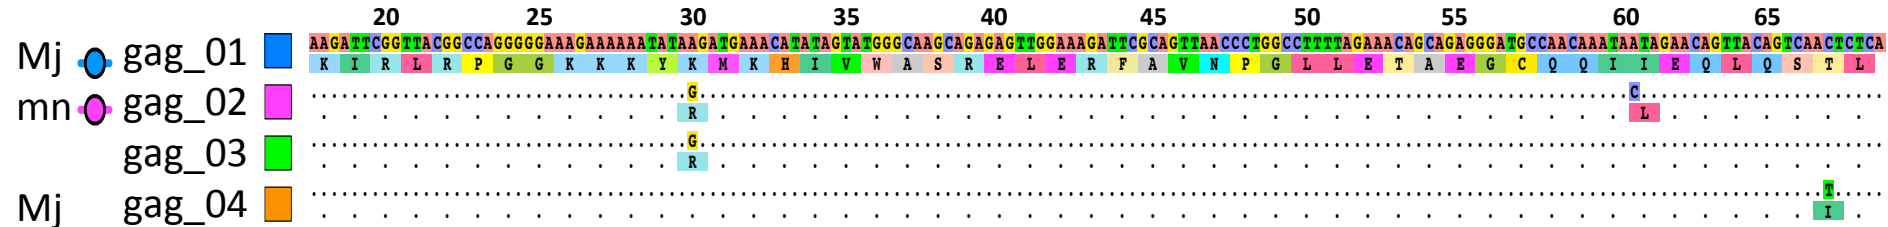

b)

### Participant 40265 RNase

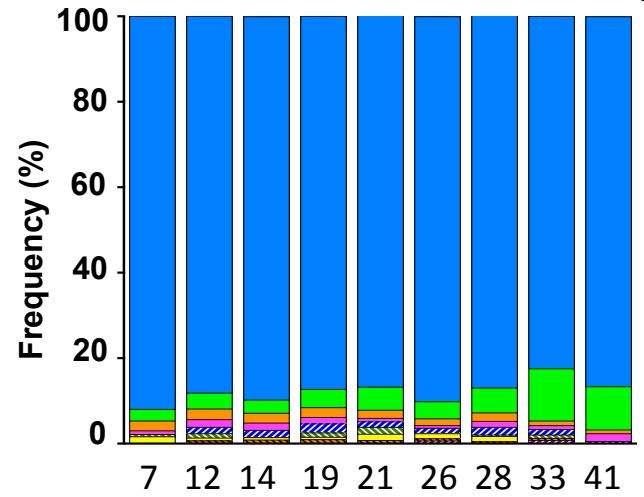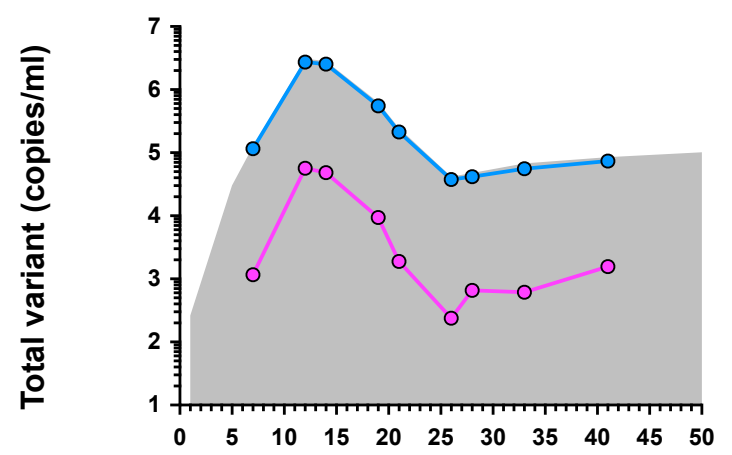

Time (days)

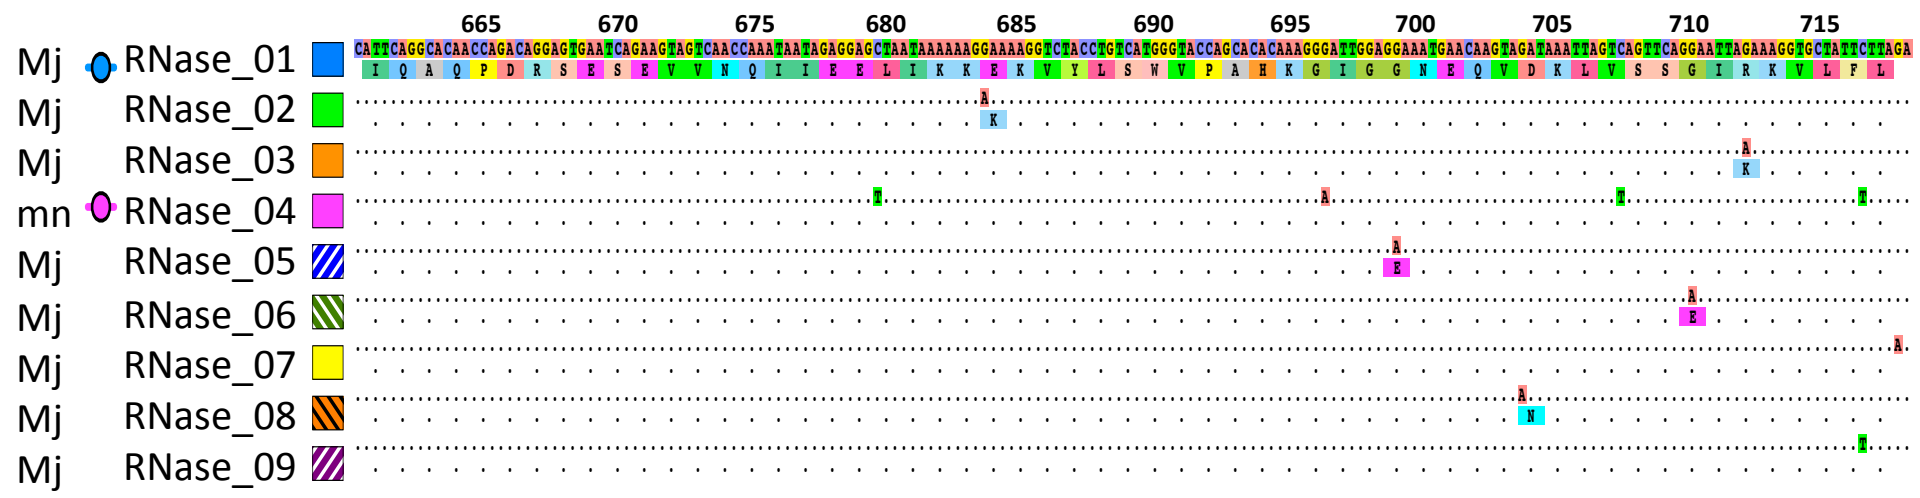

c)

## Participant 40265 Int

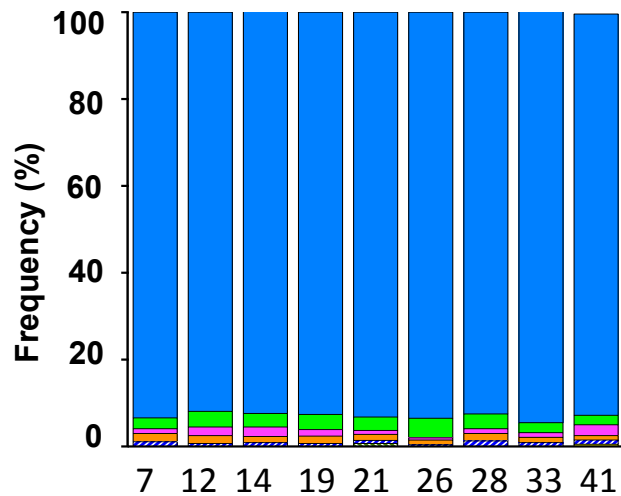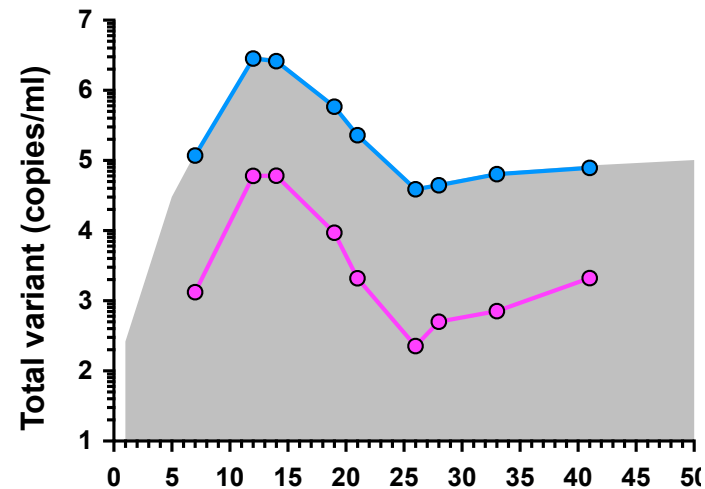

Time (days)

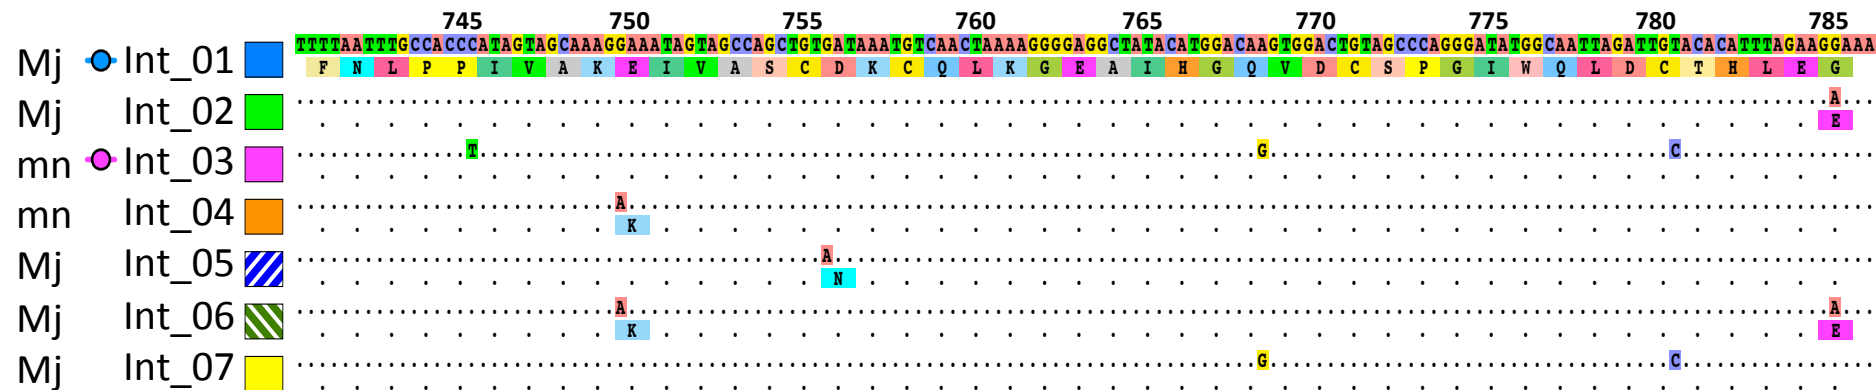

d)

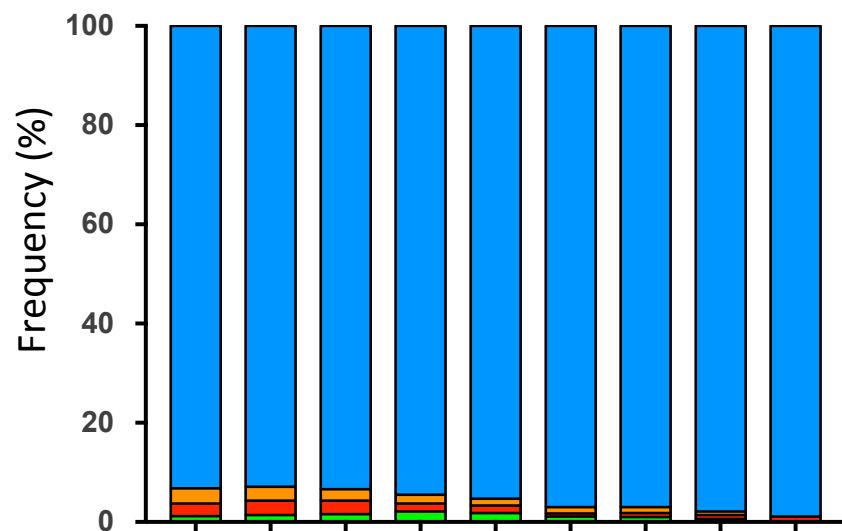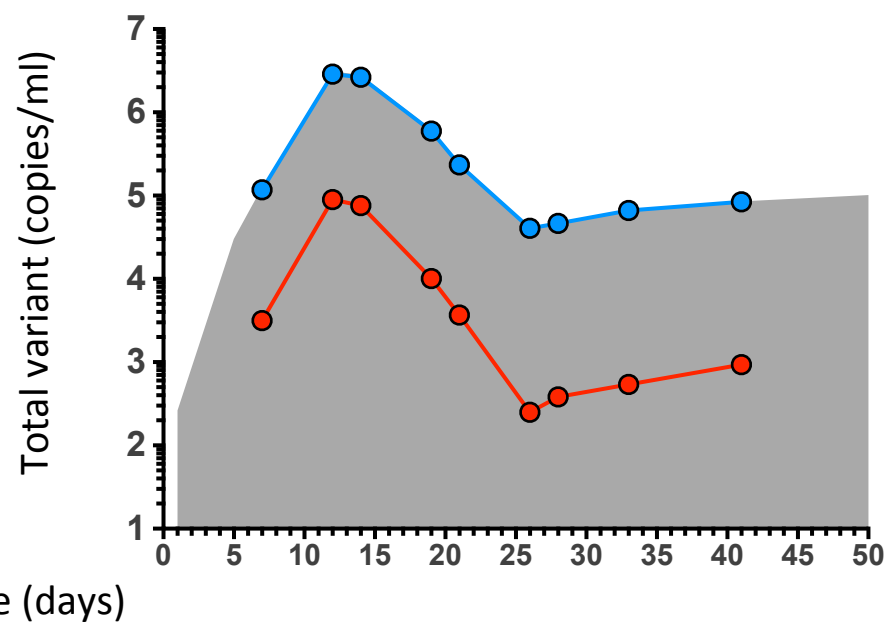

Mj Rev/Env\_01

Env GAACTCGGGACGCAGCAGTCTCAAGGGACTGAGCGGGGGGGGAAGGCCTCAAAATATCGGGAAATCTTTTGGTATTTGGAGCCAGGAGCTAAAACTAGTGCTAGTTTCTTTGCTTGATGCTACAGCAATAGCAATAGCAACAGCGGCCGGCCGGACAGATAGGGTTA

Mj Rev/Env\_02

Env FLLLGRSSSLKGLRRGWEGLKYLLVYWSQELKTSASSLLDATAIATAAWTDRV

mn Rev/Env\_03

Rev TSGTQQSQGTETGVGRPQISGKSFGILEPGAKN\*

Mj Rev/Env\_04

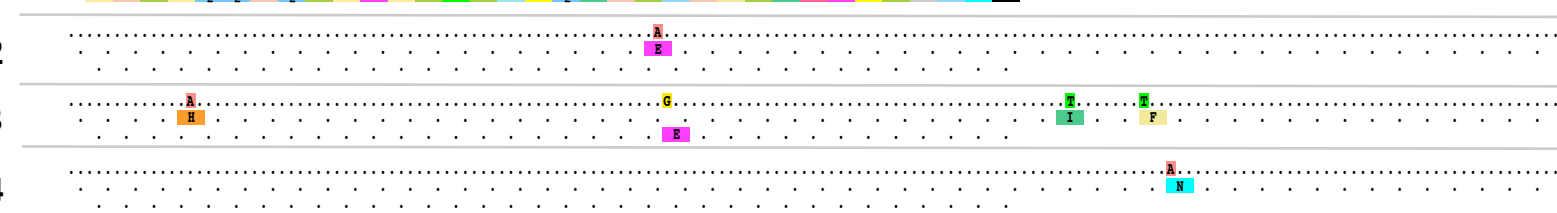

Supplement: ppat.1006510.s010.pdf [file ppat.1006510.s010.pdf]
