# Supplementary material for: Rare HIV-1 transmitted/founder lineages identified by deep viral sequencing contribute to rapid shifts in dominant quasispecies during acute and early infection
Source: PubMed Central journal article supplement (PMC5552316; doi:10.1371/journal.ppat.1006510), 2017-07-31
Supplement: ppat.1006510.s013.pdf [file ppat.1006510.s013.pdf]

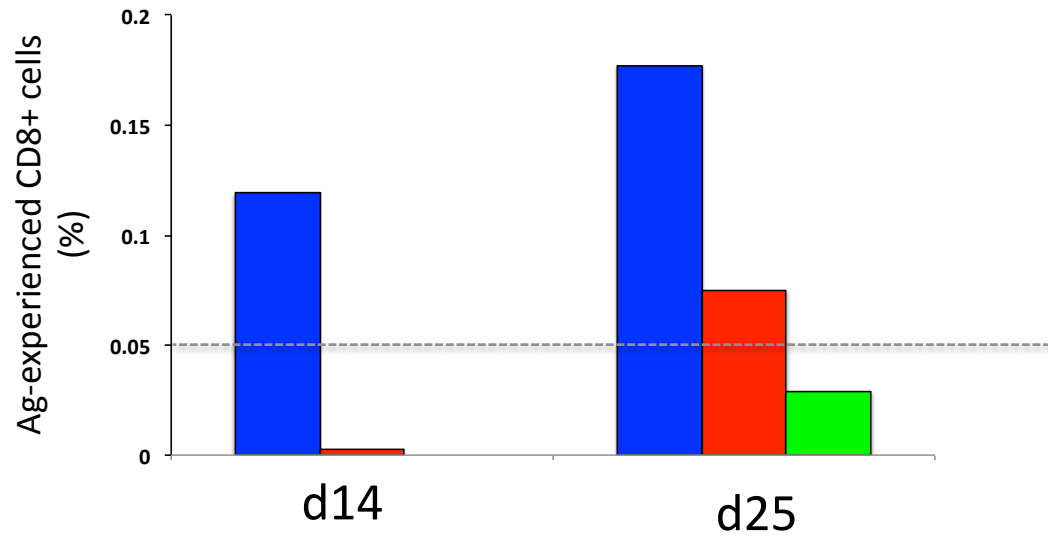

- SQAQHTAIM (Major T/F WT; SM9\_01)
- SQAQHTIM (minor T/F WT; SM9\_02)
- SHAQHTAIM (Major T/F mutant; SM9\_04)
