# Supplementary material for: Rare HIV-1 transmitted/founder lineages identified by deep viral sequencing contribute to rapid shifts in dominant quasispecies during acute and early infection
Source: PubMed Central journal article supplement (PMC5552316; doi:10.1371/journal.ppat.1006510), 2017-07-31
Supplement: ppat.1006510.s016.pdf [file ppat.1006510.s016.pdf]

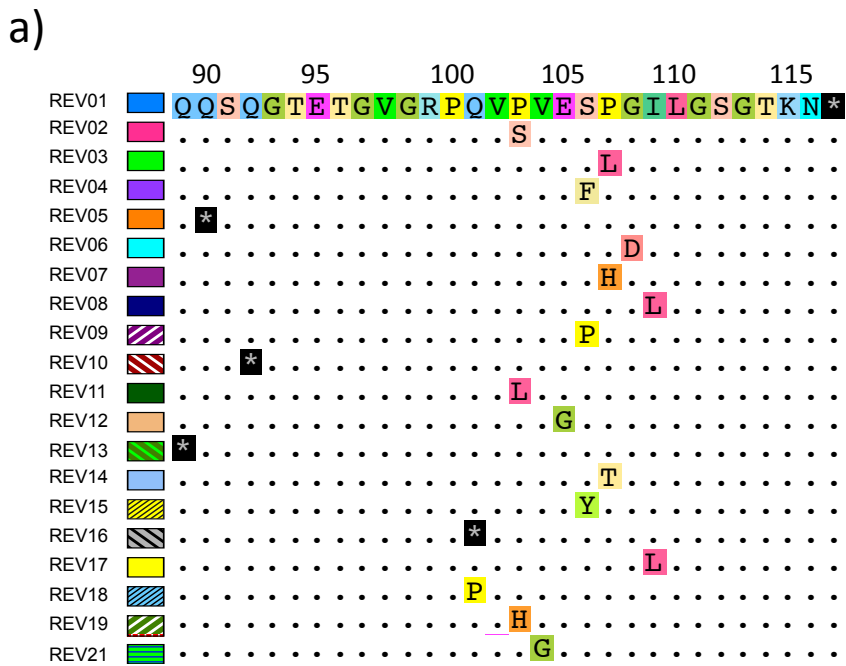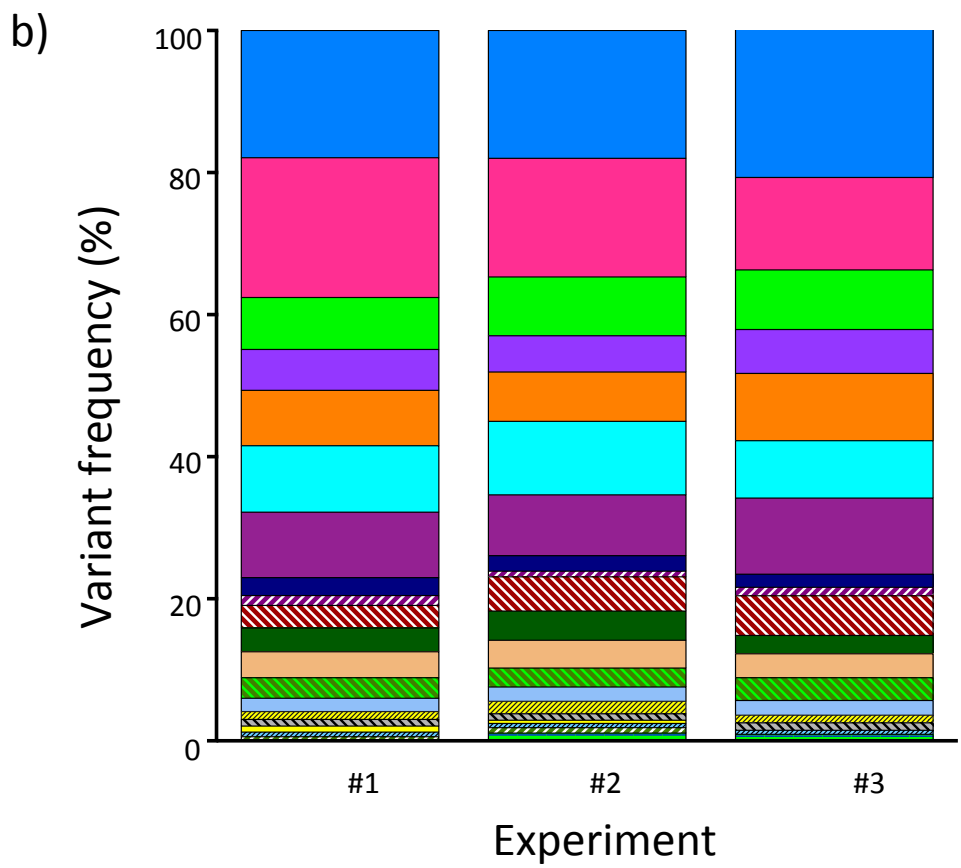

c)

| Variant    | mean | coef variation (%) |
|------------|------|--------------------|
| 20225Rev01 | 18.9 | 8.4                |
| 20225Rev02 | 16.5 | 20.3               |
| 20225Rev03 | 8    | 7.6                |
| 20225Rev04 | 5.7  | 9.5                |
| 20225Rev05 | 8.1  | 16.1               |
| 20225Rev06 | 9.3  | 12.3               |
| 20225Rev07 | 9.5  | 11.6               |
| 20225Rev08 | 2.2  | 16.3               |
| 20225Rev09 | 1.1  | 27.6               |
| 20225Rev10 | 4.5  | 27.1               |
| 20225Rev11 | 3.3  | 23.2               |
| 20225Rev12 | 3.6  | 7.5                |
| 20225Rev13 | 2.9  | 9.8                |
| 20225Rev14 | 2    | 5.2                |
| 20225Rev15 | 1.3  | 29.5               |
| 20225Rev16 | 1    | 7.7                |
| 20225Rev17 | 0.4  | 99.9               |
| 20225Rev18 | 0.6  | 7.5                |
| 20225Rev19 | 0.4  | 88.7               |
| 20225Rev21 | 0.7  | 87.6               |

d) Correlation among replicates.

| Experiments | R <sup>2</sup> | Spearman's $\rho$ |
|-------------|----------------|-------------------|
| #1 vs. #2   | 0.972          | 0.956             |
| #1 vs. #3   | 0.882          | 0.969             |
| #2 vs. #3   | 0.920          | 0.970             |
