# Supplementary material for: Rare HIV-1 transmitted/founder lineages identified by deep viral sequencing contribute to rapid shifts in dominant quasispecies during acute and early infection
Source: PubMed Central journal article supplement (PMC5552316; doi:10.1371/journal.ppat.1006510), 2017-07-31
Supplement: ppat.1006510.s017.pdf [file ppat.1006510.s017.pdf]

**S1Table.** Diversity analysis of SGA-derived near full-length HIV-1 genomes at pre-peak viremia.

| <b>Participant</b> | <b>Time since first positive viremia (days)</b> | <b>Fiebig stage</b> | <b>Total number of HIV-1 genomes</b> | <b>Hamming's distance <sup>a</sup> (mean)</b> | <b>Estimated tMRCA <sup>a</sup> (days; 95%CI)</b> | <b>Star phylogeny <sup>a</sup></b> |
|--------------------|-------------------------------------------------|---------------------|--------------------------------------|-----------------------------------------------|---------------------------------------------------|------------------------------------|
| 20225              | 5                                               | I-II                | 10                                   | 3.3                                           | 16 (9-23)                                         | Yes                                |
| 40100              | 2                                               | I-II                | 10                                   | 1.8                                           | 9 (6-12)                                          | Yes                                |
| 40061              | 7                                               | I-II                | 11                                   | 2.0                                           | 10 (5-15)                                         | Yes                                |
| 40436              | 4                                               | I-II                | 10                                   | 4.2                                           | 20 (11-30)                                        | Yes                                |
| 10463              | 7                                               | I-II                | 10                                   | 4.4                                           | 21 (13-30)                                        | Yes                                |
| 40265              | 7                                               | I-II                | 12                                   | 5.7                                           | 28 (18-38)                                        | Yes                                |

<sup>a</sup> Genomes with Fisher Exact p-value <0.1 in the hypermutation test were excluded from model analysis (see text for details).
