# Supplementary material for: Rare HIV-1 transmitted/founder lineages identified by deep viral sequencing contribute to rapid shifts in dominant quasispecies during acute and early infection
Source: PubMed Central journal article supplement (PMC5552316; doi:10.1371/journal.ppat.1006510), 2017-07-31
Supplement: ppat.1006510.s018.pdf [file ppat.1006510.s018.pdf]

**S2 Table.** Genetic distance between cognate transmitted/founder viruses (T/F viruses) sampled in cryptic multiple infections.

| Participant | T/F viruses         | Nucleotide <sup>a</sup> |          | Amino Acid <sup>a</sup> |
|-------------|---------------------|-------------------------|----------|-------------------------|
|             |                     | Full-length             | Envelope | Envelope                |
| 40100       | Major vs. minor     | 1.4%                    | 2.0%     | 3.1%                    |
| 40061       | Major vs. minor     | 1.8%                    | 2.4%     | 4.4%                    |
| 40436       | Major vs. minor#1   | 0.9%                    | 1.2%     | 2.1%                    |
|             | Major vs. minor#2   | 1.0%                    | 1.8%     | 3.7%                    |
|             | Minor#1 vs. minor#2 | 1.0%                    | 1.8%     | 3.3%                    |
| 10463       | Major vs. minor #1  | 2.2%                    | 3.4%     | 6.0%                    |
| 40265       | Major vs. minor     | 0.7%                    | 0.8%     | 2.0%                    |

<sup>a</sup> p-distances
