# Supplementary material for: Rare HIV-1 transmitted/founder lineages identified by deep viral sequencing contribute to rapid shifts in dominant quasispecies during acute and early infection
Source: PubMed Central journal article supplement (PMC5552316; doi:10.1371/journal.ppat.1006510), 2017-07-31
Supplement: ppat.1006510.s019.pdf [file ppat.1006510.s019.pdf]

S3 Table. IFN-gamma ELISpot CD8+ T cell responses to autologous HIV-1 peptides.

| Participant  | HXB2 location              | Sequence                                 | Time point (days) | Average spot forming units/<br>10 <sup>6</sup> PBMC |
|--------------|----------------------------|------------------------------------------|-------------------|-----------------------------------------------------|
| <b>20225</b> | Gag 78→86                  | LFNTVAVLY                                | 52                | 637                                                 |
|              | Gag 180→188                | TPQDLNMML                                | 94                | 1320                                                |
|              | Pol 17→26                  | STEQTRTISP                               | 94                | 230                                                 |
|              | Pol 650→658                | IVTDSQYAL                                | 94                | 650                                                 |
|              | Pol 811→819                | ETAYYILKL                                | 94                | 90                                                  |
|              | Rev 21→29                  | ILYQSNPYP                                | 52                | 543                                                 |
|              | Rev 97→104                 | VGRPQVPV                                 | 52                | 33                                                  |
|              | Rev 102→110                | VPVESPGIL                                | 52                | 127                                                 |
|              | Vpu 11→18                  | RIGVAALL                                 | 52                | 493                                                 |
|              | Vpr 48→57                  | ETYGDTWLGV                               | 94                | 210                                                 |
|              | Nef 64→72                  | GEVGFVVRP                                | 52                | 367                                                 |
| <b>40061</b> | Gag 73→81                  | EELKSLFNA                                | 90                | 240                                                 |
|              | Gag 78→86                  | LFNAVAVLW                                | 90                | 1610                                                |
|              | Gag 368→76                 | SQAQHTAIM                                | 53                | 169                                                 |
|              | Pol 841→849                | VKAACWWAN                                | 90                | 117                                                 |
|              | Pol 846→854                | WWANVQQEF                                | 90                | 487                                                 |
|              | Pol 850→858                | VQQEFGIPY                                | 90                | 1237                                                |
|              | Env 42→52                  | VPVWKDADTTL                              | 90                | 2055                                                |
|              | Env 45→53                  | WKDADTTLF                                | 90                | 647                                                 |
|              | Env 638→645                | YTNQIYEI                                 | 90                | 2530                                                |
|              | Vpu 59→67                  | DELAKLVEM                                | 90                | 3355                                                |
|              | Vif 127→135                | QVVRHRCEY                                | 53                | 1330                                                |
|              | Vpr 7→15                   | NQGQREPY                                 | 53                | 1140                                                |
|              | Vpr 18→26                  | WALELLEEL                                | 90                | 1127                                                |
| <b>40100</b> | Env 814→822                | LLDATAIAV                                | 17                | 794                                                 |
|              | Env 208→217                | VSFDPPIPIHY                              | 17                | 338                                                 |
|              | Nef 52→60                  | NADSVWVRA                                | 17                | 204                                                 |
|              | Pol 709→717                | SGIRKVLFL                                | 94                | 471                                                 |
| <b>40265</b> | Rev 55→70                  | QRQIREISERILSTCVGR                       | 41                | 183                                                 |
|              | Env 765→782                | LFSYHRLRDFISIAARTV                       | 41                | 133                                                 |
|              | Pol 593→610                | ETFYVDGAANRETKLGKA                       | 41                | 128                                                 |
|              | Pol 89→106                 | LEDINLPGKWKPKMIGGI                       | 41                | 88                                                  |
|              | Pol 345→362<br>Pol 353→370 | GSDLEIGQHRTKVEELRA<br>HRTKVEELRAHLLSWGFT | 41                | 483                                                 |
|              | Gag 479→496<br>Gag 485→500 | NEKHPPPLVSLKSLFGND<br>PLVSLKSLFGNDPLSQ   | 41                | 78                                                  |
