# Supplementary material for: Rare HIV-1 transmitted/founder lineages identified by deep viral sequencing contribute to rapid shifts in dominant quasispecies during acute and early infection
Source: PubMed Central journal article supplement (PMC5552316; doi:10.1371/journal.ppat.1006510), 2017-07-31
Supplement: ppat.1006510.s020.pdf [file ppat.1006510.s020.pdf]

**S4 Table.** Primers used for targeted deep sequencing. See text for details.

|                           | Primer <sup>a</sup>       | Name        | Sequence (5'->3')                | Position <sup>b</sup> |      |
|---------------------------|---------------------------|-------------|----------------------------------|-----------------------|------|
|                           |                           |             |                                  | from                  | to   |
| <b>Participant: 20225</b> |                           |             |                                  |                       |      |
| <b>Region: <i>pol</i></b> |                           |             |                                  |                       |      |
|                           | RT                        | 20225GPR03  | CCCTCCTATTTTTACTGTGACAAGG        | 2279                  | 2303 |
|                           | 1 <sup>st</sup> round Fwd | 20225GPF03  | ACTGCACTGAAAGACAGGCTAAT          | 2063                  | 2085 |
|                           | 1 <sup>st</sup> round Rev | 20225GPR03  | CCCTCCTATTTTTACTGTGACAAGG        | 2279                  | 2303 |
|                           | 2 <sup>nd</sup> round Fwd | 20225GPF02  | GGGGAGGCCAGGAAAC                 | 2115                  | 2130 |
|                           | 2 <sup>nd</sup> round Rev | 20225GPR02  | TGCCAAAGAGTGATTTGAGG             | 2253                  | 2272 |
| <b>Region: V2</b>         |                           |             |                                  |                       |      |
|                           | RT                        | 20225ER04   | TATAGGAATTGGTTCAAAAGTGACC        | 6845                  | 6869 |
|                           | 1 <sup>st</sup> round Fwd | 20225EF04   | CACACTAATGTTACCTACAATAACACCAT    | 6642                  | 6670 |
|                           | 1 <sup>st</sup> round Rev | 20225ER04   | TATAGGAATTGGTTCAAAAGTGACC        | 6845                  | 6869 |
|                           | 2 <sup>nd</sup> round Fwd | 20225EF03   | TCAATATGACCACAGAAATAAGAGATAGA    | 6700                  | 6728 |
|                           | 2 <sup>nd</sup> round Rev | 20225ER03   | GGCTTGTGTTAAGGCTGAGG             | 6817                  | 6836 |
| <b>Region: <i>rev</i></b> |                           |             |                                  |                       |      |
|                           | RT                        | 20225REVR02 | CCTGATTCTTCTAGGTATGTTGATAATAGCCC | 8737                  | 8768 |
|                           | 1 <sup>st</sup> round Fwd | 20225REVF02 | GCGGATTCTTAGCACTTGCC             | 8473                  | 8492 |
|                           | 1 <sup>st</sup> round Rev | 20225REVR02 | CCTGATTCTTCTAGGTATGTTGATAATAGCCC | 8737                  | 8768 |
|                           | 2 <sup>nd</sup> round Fwd | 20225REVF01 | GGACTGTGGAACCTTCTGGGAC           | 8563                  | 8583 |
|                           | 2 <sup>nd</sup> round Rev | 20225REVR01 | TGTCCAGCCAGCTACTACTATTGC         | 8679                  | 8702 |
| <b>Participant: 40100</b> |                           |             |                                  |                       |      |
| <b>Region: <i>pol</i></b> |                           |             |                                  |                       |      |
|                           | RT                        | 40100POL04R | GTTCTTTCTGATGCTTTTTGTCTG         | 3199                  | 3222 |

|                           |              |                                 |      |      |
|---------------------------|--------------|---------------------------------|------|------|
| 1 <sup>st</sup> round Fwd | 40100POL03F  | GTTATCTATCAATACATGGATGACTTGTATG | 3084 | 3114 |
| 1 <sup>st</sup> round Rev | 40100POL04R  | GTTCTTTCTGATGCTTTTTGTCTG        | 3199 | 3222 |
| 2 <sup>nd</sup> round Fwd | 40100POL01FA | TCAATACATGGATGACTTGTATGTAGG     | 3092 | 3118 |
| 2 <sup>nd</sup> round Rev | 40100POL02RA | CTTTCTGATGCTTTTTGTCTGGTG        | 3196 | 3219 |

**Region: V5**

|                           |                   |                             |      |      |
|---------------------------|-------------------|-----------------------------|------|------|
| RT                        | 40100V5_REVM3     | ATTTCTCCAATTGTCTTTTATATTTCC | 7641 | 7667 |
| 1 <sup>st</sup> round Fwd | 40100V5_FWDM<br>3 | GCAATGTATGCTCCTCCCATCA      | 7521 | 7542 |
| 1 <sup>st</sup> round Rev | 40100V5_REVM3     | ATTTCTCCAATTGTCTTTTATATTTCC | 7641 | 7667 |
| 2 <sup>nd</sup> round Fwd | 40100V5FWDA       | ATGTATGCTCCTCCCATCAAGG      | 7524 | 7545 |
| 2 <sup>nd</sup> round Rev | 40100V5REVA       | TCTCCAATTGTCTTTTATATTTCTCC  | 7638 | 7664 |

**Region: gp41**

|                           |               |                            |      |      |
|---------------------------|---------------|----------------------------|------|------|
| RT                        | 40100GP41R02  | CTCCCATGTTATAGCAAAGCTC     | 8782 | 8803 |
| 1 <sup>st</sup> round Fwd | 40100GP41F02  | GGACGCAGCAGTCTCCAG         | 8563 | 8580 |
| 1 <sup>st</sup> round Rev | 40100GP41R02  | CTCCCATGTTATAGCAAAGCTC     | 8782 | 8803 |
| 2 <sup>nd</sup> round Fwd | 40100GP41F01A | GAAGGCCTCAAATATCTGGG       | 8595 | 8614 |
| 2 <sup>nd</sup> round Rev | 40100GP41R01A | GATCTGATTCTTCTGGGTATGTGGAG | 8745 | 8770 |

**Region: nef**

|                           |              |                            |      |      |
|---------------------------|--------------|----------------------------|------|------|
| RT                        | 40100NEF04R  | TTAAAAAGAAGCTAAGATCAAAGCTC | 9044 | 9070 |
| 1 <sup>st</sup> round Fwd | 40100NEF02F  | GATAAACATGGAGCAGTAACAAGTG  | 8908 | 8932 |
| 1 <sup>st</sup> round Rev | 40100NEF04R  | TTAAAAAGAAGCTAAGATCAAAGCTC | 9044 | 9070 |
| 2 <sup>nd</sup> round Fwd | 40100NEF01FA | ATGGAGCAGTAACAAGTGAAAATATG | 8915 | 8940 |
| 2 <sup>nd</sup> round Rev | 40100NEF03RA | AAAAGCTCCCTTATAAGTCATTGG   | 9028 | 9051 |

**Participant: 40061**

**Region: p2**

|    |            |                             |      |      |
|----|------------|-----------------------------|------|------|
| RT | 40061P2R02 | CAGTCTTTCATTTGATGTCCTTCCTTC | 2040 | 2066 |
|----|------------|-----------------------------|------|------|

|                           |            |                             |      |      |
|---------------------------|------------|-----------------------------|------|------|
| 1 <sup>st</sup> round Fwd | 40061P2F02 | TTGCTAGTCCAAAATGCCAATCC     | 1750 | 1772 |
| 1 <sup>st</sup> round Rev | 40061P2R02 | CAGTCTTTCATTTGATGTCCTTCCTTC | 2040 | 2066 |
| 2 <sup>nd</sup> round Fwd | 40061P2F01 | CAAGGCCATTTTAAAGAGCATTAGG   | 1779 | 1802 |
| 2 <sup>nd</sup> round Rev | 40061P2R01 | ACATTTCCAACAACCCTTTTTTCCTAG | 2012 | 2037 |

**Region: vif**

|                           |             |                                |      |      |
|---------------------------|-------------|--------------------------------|------|------|
| RT                        | 40061VIFR02 | TAACACTAGGCAGAGGTGGCTTTATCC    | 5513 | 5539 |
| 1 <sup>st</sup> round Fwd | 40061VIFR02 | GAAACTATAGCACACAAATAGATCCTGACC | 5316 | 5344 |
| 1 <sup>st</sup> round Rev | 40061VIFR02 | TAACACTAGGCAGAGGTGGCTTTATCC    | 5513 | 5539 |
| 2 <sup>nd</sup> round Fwd | 40061VIFR01 | GACTGATTCATCTGCAATATTTTGACTG   | 5354 | 5381 |
| 2 <sup>nd</sup> round Rev | 40061VIFR01 | GGTGTGTTAATGCTTTCAGTGCC        | 5484 | 5507 |

**Region: vpr**

|                           |             |                                |      |      |
|---------------------------|-------------|--------------------------------|------|------|
| RT                        | 40061VPRR01 | CTGACTTCCCGGATGATTCC           | 5862 | 5881 |
| 1 <sup>st</sup> round Fwd | 40061VPRF01 | AAGGAAAGCCATATTAGGACAAGTAGTTAG | 5400 | 5429 |
| 1 <sup>st</sup> round Rev | 40061VPRR01 | CTGACTTCCCGGATGATTCC           | 5862 | 5881 |
| 2 <sup>nd</sup> round Fwd | 40061VPRF02 | GCACTGAAAGCATTAAACAACACC       | 5485 | 5507 |
| 2 <sup>nd</sup> round Rev | 40061VPRR03 | GGAGCCAGGACCTAGGAAAATGTC       | 5653 | 5676 |

**Region: env**

|                           |             |                            |      |      |
|---------------------------|-------------|----------------------------|------|------|
| RT                        | 40061ENVR01 | CGCACTGATCTGTCTCTGCC       | 8445 | 8464 |
| 1 <sup>st</sup> round Fwd | 40061ENVF01 | GGCTGTGGAAAGATACCTAAAAGATC | 7967 | 7992 |
| 1 <sup>st</sup> round Rev | 40061ENVR01 | CGCACTGATCTGTCTCTGCC       | 8445 | 8464 |
| 2 <sup>nd</sup> round Fwd | 40061ENVF02 | CTTTGGGGATGCTCTGGAA        | 8007 | 8025 |
| 2 <sup>nd</sup> round Rev | 40061ENVR02 | AACCAACTCCACAGGCTTGC       | 8223 | 8242 |

**Participant: 40436**

**Region: p7**

|                           |            |                         |      |      |
|---------------------------|------------|-------------------------|------|------|
| RT                        | 40436P7R02 | TGGGGCTGTTGGCTCTG       | 2147 | 2163 |
| 1 <sup>st</sup> round Fwd | 40436P7F02 | TGGCCATAAAGCAAGGGTTTTAG | 1857 | 1879 |

|                           |            |                           |      |      |
|---------------------------|------------|---------------------------|------|------|
| 1 <sup>st</sup> round Rev | 40436P7R02 | TGGGGCTGTTGGCTCTG         | 2147 | 2163 |
| 2 <sup>nd</sup> round Fwd | 40436P7F01 | AGGCAACTATAATGATGCAGAGAGG | 1907 | 1931 |
| 2 <sup>nd</sup> round Rev | 40436P7R01 | AAATTCCCCGGCCTTCC         | 2116 | 2132 |

**Region: C3V4**

|                           |              |                                  |      |      |
|---------------------------|--------------|----------------------------------|------|------|
| RT                        | 40436C3V4R02 | CCCAAAGATCATAGCTCCTATTCCC        | 7763 | 7787 |
| 1 <sup>st</sup> round Fwd | 40436C3V4F02 | AACAGGTAGCTGGAAAATTTAAAAGAGCAC   | 7252 | 7280 |
| 1 <sup>st</sup> round Rev | 40436C3V4R02 | CCCAAAGATCATAGCTCCTATTCCC        | 7763 | 7787 |
| 2 <sup>nd</sup> round Fwd | 40436C3V4F01 | AATTGTAGAGGGGAGTTTTTCTATTGCAATAC | 7353 | 7384 |
| 2 <sup>nd</sup> round Rev | 40436C3V4R01 | TTGTCCTTTATATTTCTCCTCCAGG        | 7632 | 7657 |

**Region: gp41**

|                           |              |                             |      |      |
|---------------------------|--------------|-----------------------------|------|------|
| RT                        | 40436GP41R02 | GAGATACTGCTCCTACTCCTTCCGTTG | 8873 | 8899 |
| 1 <sup>st</sup> round Fwd | 40436GP41F02 | TGGGAAGGCCCTCAAATATCTGGGG   | 8592 | 8615 |
| 1 <sup>st</sup> round Rev | 40436GP41R02 | GAGATACTGCTCCTACTCCTTCCGTTG | 8873 | 8899 |
| 2 <sup>nd</sup> round Fwd | 40436GP41F01 | GGGACAGGAACTCAAACACTAGTGC   | 8633 | 8656 |
| 2 <sup>nd</sup> round Rev | 40436GP41R01 | AGGCCATCCCCTATGCTG          | 8820 | 8838 |

**Participant: 10463**

**Region: V3V4<sup>c</sup>**

|                           |              |                           |      |      |
|---------------------------|--------------|---------------------------|------|------|
| RT                        | 10463V3V4R02 | GGGATGGGAGGGGCATAC        | 7526 | 7543 |
| 1 <sup>st</sup> round Fwd | 10463V3V4F02 | ACATAATAGTGCAGTTCCAGAAGGC | 7072 | 7096 |
| 1 <sup>st</sup> round Rev | 10463V3V4R02 | GGGATGGGAGGGGCATAC        | 7526 | 7543 |

**Region: V3**

|                           |            |                                  |      |      |
|---------------------------|------------|----------------------------------|------|------|
| 2 <sup>nd</sup> round Fwd | 10463V3F01 | GAAAAGGTATACATATAGGACCAGGG       | 7141 | 7166 |
| 2 <sup>nd</sup> round Rev | 10463V3R11 | GCTACYTGTTGYAAAGCTTTATTCCAGTCTGA | 7230 | 7261 |

**Region: V4**

|                           |            |                                 |      |      |
|---------------------------|------------|---------------------------------|------|------|
| 2 <sup>nd</sup> round Fwd | 10463V4F11 | TGCTTGTCCTACTCTCTGCCAC          | 7344 | 7373 |
| 2 <sup>nd</sup> round Rev | 10463V4R01 | CATAGTTTTAATTGTGGAGGAGAATTTTTTC | 7502 | 7523 |

**Region: *nef***

|                           |            |                              |      |      |
|---------------------------|------------|------------------------------|------|------|
| RT                        | 10463NEF04 | GGAGTAAATTAACCCATCCAGTCC     | 9082 | 9105 |
| 1 <sup>st</sup> round Fwd | 10463NEF02 | AACATGGGAGGCAAAGGG           | 8794 | 8811 |
| 1 <sup>st</sup> round Rev | 10463NEF04 | GGAGTAAATTAACCCATCCAGTCC     | 9082 | 9105 |
| 2 <sup>nd</sup> round Fwd | 10463NEF01 | TGCTCCAGCTCCAGCAG            | 8862 | 8878 |
| 2 <sup>nd</sup> round Rev | 10463NEF08 | GCTGAGATCAAAAGCTCCTTTGTAAGTC | 9033 | 9060 |

---

**Participant: 40265****Region: *p17***

|                           |             |                              |      |      |
|---------------------------|-------------|------------------------------|------|------|
| RT                        | 40265P17R01 | ATCATATTTAAATCTTGTGGGGT      | 1327 | 1349 |
| 1 <sup>st</sup> round Fwd | 40265P17F01 | GCGTCAGTATTAAGTGGGG          | 802  | 820  |
| 1 <sup>st</sup> round Rev | 40265P17R01 | ATCATATTTAAATCTTGTGGGGT      | 1327 | 1349 |
| 2 <sup>nd</sup> round Fwd | 40265P17F02 | GAAAATTAGATGCATGGG           | 821  | 838  |
| 2 <sup>nd</sup> round Rev | 40265P17R03 | TAATGATTTAAGTTCCTCTGATCCTGTC | 996  | 1023 |

**Region: *RNase/int<sup>d</sup>***

|                           |               |                     |      |      |
|---------------------------|---------------|---------------------|------|------|
| RT                        | 40265RNaseR01 | TGCTGGGATAACTTCTGCT | 4484 | 4502 |
| 1 <sup>st</sup> round Fwd | 40265RNaseF01 | GCAGGATTCAGGATCAGA  | 4007 | 4024 |
| 1 <sup>st</sup> round Rev | 40265RNaseR01 | TGCTGGGATAACTTCTGCT | 4484 | 4502 |

**Region: *RNase***

|                           |               |                           |      |      |
|---------------------------|---------------|---------------------------|------|------|
| 2 <sup>nd</sup> round Fwd | 40265RnaseF02 | CAGACTCACAATATGCATTAGGAA  | 4039 | 4062 |
| 2 <sup>nd</sup> round Rev | 40265RnaseR03 | GGTCTTCTTGAGCCTTATCTATCCC | 4239 | 4263 |

**Region: *int***

|                           |               |                         |      |      |
|---------------------------|---------------|-------------------------|------|------|
| 2 <sup>nd</sup> round Fwd | 40265RnaseF03 | CAATTGGAGAACAATGGCTAGTG | 4280 | 4302 |
| 2 <sup>nd</sup> round Rev | 40265RnaseR02 | TGAACTGCTACCAGGATGAC    | 4443 | 4462 |

**Region: *gp41/rev***

|                           |              |                    |      |      |
|---------------------------|--------------|--------------------|------|------|
| RT                        | 40265REV2R01 | GACCACTTGCCTCCCAT  | 8797 | 8813 |
| 1 <sup>st</sup> round Fwd | 40265REV2F01 | CCAGACCCCTATCCATCA | 8438 | 8455 |

|                           |              |                         |      |      |
|---------------------------|--------------|-------------------------|------|------|
| 1 <sup>st</sup> round Rev | 40265REV2R01 | GACCACTTGCCTCCCAT       | 8797 | 8813 |
| 2 <sup>nd</sup> round Fwd | 40265REVF02  | CGAGCAAGGCAGAGACA       | 7717 | 7733 |
| 2 <sup>nd</sup> round Rev | 40265REVR02  | TCCAGACTCTTTGTGCTACTTCT | 8714 | 8736 |

---

a RT: reverse transcription; 1<sup>st</sup> round: first round PCR; 2<sup>nd</sup> round: second round PCR; Fwd: forward; Rev: reverse.

b Coordinates based on HXB2 reference sequence.

c Product of reverse transcription and first round PCR of 10463 V3V4 is the template for separate second round PCRs for V3 and V4 regions.

d Product of reverse transcription and first round PCR of 40265 RNase/int is the template for separate second round PCRs for RNase and int regions.
