# Supplementary material for: Rare HIV-1 transmitted/founder lineages identified by deep viral sequencing contribute to rapid shifts in dominant quasispecies during acute and early infection
Source: PubMed Central journal article supplement (PMC5552316; doi:10.1371/journal.ppat.1006510), 2017-07-31
Supplement: ppat.1006510.s021.pdf [file ppat.1006510.s021.pdf]

**S5 Table.** Class I HLA types of 6 participants from RV217.

| Participant | HLA-A <sup>1</sup> | HLA-B           | HLA-C           |
|-------------|--------------------|-----------------|-----------------|
| 20225       | A*29:02/A*68:02    | B*39:10/B*41:01 | C*12:03/C*17:01 |
| 40100       | A*02:07/A*29:01    | B*07:05/B*46:01 | C*01:02/C*15:05 |
| 40061       | A*24:07/A*24:10    | B*15:02/B*18:02 | C*07:04/C*08:01 |
| 40436       | A*02:06/A*11:01    | B*13:01/B*48:03 | C*04:06/C*08:01 |
| 10463       | A*02:02/A*02:02    | B*44:03/B*45:01 | C*04:01/C*16:01 |
| 40265       | A*02:03/A*02:07    | B*39:09/B*46:01 | C*01:02/C*07:02 |

<sup>1</sup> For the purposes of this study only 4 digit HLA designations of the most representative allele is shown. Ambiguous and rare alleles calls were ignored
